# Supplementary material for: Detection of Label-Free Drugs within Brain Tissue Using Orbitrap Secondary Ion Mass Spectrometry as a Complement to Neuro-Oncological Drug Delivery
Source: MDPI journal article supplement (doi:10.3390/pharmaceutics14030571), 2022-03-05
Supplement: s1 [file s1]

**Table S1.** Characteristic orbiSIMS peaks of 20 mL olaparib at 1 mg/ml with 20 mg homogenised rat brain tissue (final drug concentration= 0.5% [w/w]).

| No. | Center Mass<br>(u) Assignment Description |                                                                             |                   | Brain control |                      | Olaparib + Brain |                      |
|-----|-------------------------------------------|-----------------------------------------------------------------------------|-------------------|---------------|----------------------|------------------|----------------------|
|     |                                           |                                                                             |                   | Area          | Mass deviation (ppm) | Area             | Mass deviation (ppm) |
| 1   | 253.0783                                  | C <sub>15</sub> H <sub>10</sub> FN <sub>2</sub> O <sup>-</sup>              | Fragment          | 0             | +12.3                | 344242           | +0.4                 |
| 2   | 433.1677                                  | C <sub>24</sub> H <sub>22</sub> FN <sub>4</sub> O <sub>3</sub> <sup>-</sup> | Molecular ion     | 0             | -8.2                 | 1475956          | -1.1                 |
| 3   | 145.0406                                  | C <sub>8</sub> H <sub>5</sub> N <sub>2</sub> O <sup>-</sup>                 | Fragment          | 93            | -4.2                 | 14100            | -1.2                 |
| 4   | 159.0561                                  | C <sub>9</sub> H <sub>7</sub> N <sub>2</sub> O <sup>-</sup>                 | Fragment          | 0             | +5.3                 | 2111             | -1.5                 |
| 5   | 181.0982                                  | C <sub>9</sub> H <sub>13</sub> N <sub>2</sub> O <sub>2</sub> <sup>-</sup>   | Fragment          | 0             | -4.2                 | 9125             | -0.5                 |
| 6   | 153.1032                                  | C <sub>8</sub> H <sub>13</sub> N <sub>2</sub> O <sup>-</sup>                | Fragment          | 0             | -4.6                 | 7751             | -1.1                 |
| 7   | 365.1415                                  | C <sub>20</sub> H <sub>18</sub> FN <sub>4</sub> O <sub>2</sub> <sup>-</sup> | Fragment          | 0             | +1.3                 | 11365            | -1.1                 |
| 8   | 255.2329                                  | C <sub>16</sub> H <sub>31</sub> O <sub>2</sub> <sup>-</sup>                 | Brain lipid       | 38992508      | +1.7                 | 47806478         | +0.4                 |
| 9   | 152.9957                                  | C <sub>3</sub> H <sub>6</sub> PO <sub>5</sub> <sup>-</sup>                  | Brain lipid       | 4075584       | +0.3                 | 2167331          | -1.1                 |
| 10  | 281.2486                                  | C <sub>18</sub> H <sub>33</sub> O <sub>2</sub> <sup>-</sup>                 | Brain lipid       | 84148602      | +1.3                 | 86463483         | -0.0                 |
| 11  | 385.3473                                  | C <sub>27</sub> H <sub>45</sub> O <sup>-</sup>                              | Brain cholesterol | 542562        | +0.4                 | 560758           | -0.8                 |

**Table S2.** Characteristic orbiSIMS peaks of 20 mL etoposide at 1 mg/ml with 20 mg homogenised rat brain tissue (final drug concentration = 0.5% [w/w]).

| No. | Center Mass (u) Assignment Description |                                                              |                   | Brain control |                      | Etoposide + Brain |                      |
|-----|----------------------------------------|--------------------------------------------------------------|-------------------|---------------|----------------------|-------------------|----------------------|
|     |                                        |                                                              |                   | Area          | Mass Deviation (ppm) | Area              | Mass Deviation (ppm) |
| 1   | 587.176476                             | C <sub>29</sub> H <sub>31</sub> O <sub>13</sub> <sup>-</sup> | Molecular ion     | 0             | +10.1                | 195128            | -0.0                 |
| 2   | 435.129253                             | C <sub>21</sub> H <sub>23</sub> O <sub>10</sub> <sup>-</sup> | Fragment          | 0             | +4.5                 | 257               | +0.3                 |
| 3   | 153.055473                             | C <sub>8</sub> H <sub>9</sub> O <sub>3</sub> <sup>-</sup>    | Fragment          | 0             | -2.0                 | 126371            | -1.6                 |
| 4   | 383.113165                             | C <sub>21</sub> H <sub>19</sub> O <sub>7</sub> <sup>-</sup>  | Fragment          | 0             | -5.7                 | 168101            | +0.2                 |
| 5   | 255.2329                               | C <sub>16</sub> H <sub>31</sub> O <sub>2</sub> <sup>-</sup>  | Brain lipid       | 38992508      | +1.7                 | 42640092          | +1.4                 |
| 6   | 152.9957                               | C <sub>3</sub> H <sub>6</sub> PO <sub>5</sub> <sup>-</sup>   | Brain lipid       | 4075584       | +0.3                 | 4080847           | -0.0                 |
| 7   | 281.2486                               | C <sub>18</sub> H <sub>33</sub> O <sub>2</sub> <sup>-</sup>  | Brain lipid       | 84148602      | +1.3                 | 84980993          | +1.1                 |
| 8   | 385.3473                               | C <sub>27</sub> H <sub>45</sub> O <sup>-</sup>               | Brain cholesterol | 542562        | +0.4                 | 420006            | +0.1                 |

Table S3. Characteristic orbiSIMS peaks of 20 mg/mL olaparib in homogenised rat brain tissue

| No. | Center Mass (u) | Assignment                                                                  | Description       | Brain control |                      | Olaparib + Brain |                      |
|-----|-----------------|-----------------------------------------------------------------------------|-------------------|---------------|----------------------|------------------|----------------------|
|     |                 |                                                                             |                   | Area          | Mass deviation (ppm) | Area             | Mass deviation (ppm) |
| 1   | 253.0783        | C <sub>15</sub> H <sub>10</sub> FN <sub>2</sub> O <sup>-</sup>              | Fragment          | 0             | +12.3                | 8130             |                      |
| 2   | 433.1677        | C <sub>24</sub> H <sub>22</sub> FN <sub>4</sub> O <sub>3</sub> <sup>-</sup> | Molecular ion     | 0             | -8.2                 | 68148            |                      |
| 3   | 145.0406        | C <sub>8</sub> H <sub>5</sub> N <sub>2</sub> O <sup>-</sup>                 | Fragment          | 93            | -4.2                 | 91220            |                      |
| 4   | 159.0561        | C <sub>9</sub> H <sub>7</sub> N <sub>2</sub> O <sup>-</sup>                 | Fragment          | 0             | +5.3                 | 35794            |                      |
| 5   | 181.0982        | C <sub>9</sub> H <sub>13</sub> N <sub>2</sub> O <sub>2</sub> <sup>-</sup>   | Fragment          | 0             | -4.2                 | 259033           |                      |
| 6   | 153.1032        | C <sub>8</sub> H <sub>13</sub> N <sub>2</sub> O <sup>-</sup>                | Fragment          | 0             | -4.6                 | 154525           |                      |
| 7   | 365.1415        | C <sub>20</sub> H <sub>18</sub> FN <sub>4</sub> O <sub>2</sub> <sup>-</sup> | Fragment          | 0             | +1.3                 | 95               |                      |
| 8   | 255.2329        | C <sub>16</sub> H <sub>31</sub> O <sub>2</sub> <sup>-</sup>                 | Brain lipid       | 38992508      | +1.7                 | 34119796         |                      |
| 9   | 281.2486        | C <sub>18</sub> H <sub>33</sub> O <sub>2</sub> <sup>-</sup>                 | Brain lipid       | 84148602      | +1.3                 | 52791661         |                      |
| 10  | 385.3473        | C <sub>27</sub> H <sub>45</sub> O <sup>-</sup>                              | Brain cholesterol | 542562        | +0.4                 | 4664140          |                      |

Table S4. Characteristic orbiSIMS peaks of 20 mL vorinostat at 1 mg/ml with 20 mg homogenised rat brain tissue (final drug concentration = 0.5% [w/w]).

| No. | Center Mass (u) | Assignment                                                                 | Description       | Brain control |                      | Vorinostat + brain |                      |
|-----|-----------------|----------------------------------------------------------------------------|-------------------|---------------|----------------------|--------------------|----------------------|
|     |                 |                                                                            |                   | Area          | Mass deviation (ppm) | Area               | Mass deviation (ppm) |
| 1   | 263.1397        | C <sub>14</sub> H <sub>19</sub> N <sub>2</sub> O <sub>3</sub> <sup>-</sup> | M-H               | 353           | -1.5                 | 1687335            | -0.6                 |
| 2   | 264.1431        | C <sub>14</sub> H <sub>20</sub> N <sub>2</sub> O <sub>3</sub> <sup>-</sup> | M                 | 0             | -16.4                | 166727             | -1.4                 |
| 3   | 202.1244        | C <sub>13</sub> H <sub>16</sub> NO <sup>-</sup>                            | Fragment          | 311           | 3.1                  | 70003              | -1.1                 |
| 4   | 176.1083        | C <sub>11</sub> H <sub>14</sub> NO <sup>-</sup>                            | Fragment          | 176           | 1.4                  | 1145               | -1.9                 |
| 5   | 190.1228        | C <sub>12</sub> H <sub>16</sub> NO <sup>-</sup>                            | Fragment          | 0             | -4.7                 | 563                | -0.9                 |
| 6   | 204.1394        | C <sub>13</sub> H <sub>18</sub> NO <sup>-</sup>                            | Fragment          | 306           | 0.1                  | 4835               | -1.1                 |
| 7   | 247.1452        | C <sub>14</sub> H <sub>19</sub> N <sub>2</sub> O <sub>2</sub> <sup>-</sup> | Fragment          | 848           | -0.1                 | 10259              | -0.8                 |
| 8   | 172.0978        | C <sub>8</sub> H <sub>14</sub> NO <sub>3</sub> <sup>-</sup>                | Fragment          | 494           | 2.7                  | 1229               | 1.2                  |
| 9   | 187.1096        | C <sub>8</sub> H <sub>15</sub> N <sub>2</sub> O <sub>3</sub> <sup>-</sup>  | Fragment          | 0             | 4.1                  | 2209               | -1.1                 |
| 10  | 255.2339        | C <sub>16</sub> H <sub>31</sub> O <sub>2</sub> <sup>-</sup>                | Brain lipid       | 24792697      | 1.2                  | 24431231           | 0.0                  |
| 11  | 281.2486        | C <sub>18</sub> H <sub>33</sub> O <sub>2</sub> <sup>-</sup>                | Brain lipid       | 42916135      | 0.9                  | 38923936           | -0.4                 |
| 12  | 385.3473        | C <sub>27</sub> H <sub>45</sub> O <sup>-</sup>                             | Brain cholesterol | 3582325       | -0.3                 | 43333052           | -1.5                 |

Table S5. Characteristic orbiSIMS peaks of 20 mL gemcitabine at 1 mg/ml with 20 mg homogenised rat brain tissue (final drug concentration = 0.5% [w/w]).

| No. | Center Mass (u) | Assignment                                                                               | Description       | Brain control |                      | Gemcitabine + brain |                      |
|-----|-----------------|------------------------------------------------------------------------------------------|-------------------|---------------|----------------------|---------------------|----------------------|
|     |                 |                                                                                          |                   | Area          | Mass deviation (ppm) | Area                | Mass deviation (ppm) |
| 1   | 262.0650        | C <sub>9</sub> H <sub>10</sub> F <sub>2</sub> N <sub>3</sub> O <sub>4</sub> <sup>-</sup> | Molecular ion     | 0             | 2                    | 101904              | 1.2                  |
| 2   | 247.0539        | C <sub>9</sub> H <sub>9</sub> F <sub>2</sub> N <sub>2</sub> O <sub>4</sub> <sup>-</sup>  | Fragment          | 0             | 3.5                  | 419                 | 0.4                  |
| 3   | 246.0704        | C <sub>9</sub> H <sub>10</sub> F <sub>2</sub> N <sub>3</sub> O <sub>3</sub> <sup>-</sup> | Fragment          | 0             | 3.4                  | 658                 | -0.3                 |
| 4   | 232.0544        | C <sub>8</sub> H <sub>8</sub> F <sub>2</sub> N <sub>3</sub> O <sub>3</sub> <sup>-</sup>  | Fragment          | 0             | 1.9                  | 1189                | -1.6                 |
| 5   | 244.0731        | C <sub>9</sub> H <sub>11</sub> FN <sub>3</sub> O <sub>4</sub> <sup>-</sup>               | Fragment          | 387           | -3.2                 | 1892                | -0.3                 |
| 6   | 243.0657        | C <sub>9</sub> H <sub>10</sub> FN <sub>3</sub> O <sub>4</sub> <sup>-</sup>               | Fragment          | 0             | 0.7                  | 774                 | 0.0                  |
| 9   | 255.2339        | C <sub>16</sub> H <sub>31</sub> O <sub>2</sub> <sup>-</sup>                              | Brain lipid       | 24792697      | 1.2                  | 140961907           | 2.1                  |
| 10  | 281.2486        | C <sub>18</sub> H <sub>33</sub> O <sub>2</sub> <sup>-</sup>                              | Brain lipid       | 42916135      | 0.9                  | 277414449           | 1.8                  |
| 11  | 385.3473        | C <sub>27</sub> H <sub>45</sub> O <sup>-</sup>                                           | Brain cholesterol | 3582325       | -0.3                 | 35431934            | 0.5                  |

Table S6. Characteristic orbiSIMS peaks of 20 mL dasatinib at 1 mg/ml with 20 mg homogenised rat brain tissue (final drug concentration = 0.5% [w/w]).

| No. | Center Mass (u) | Assignment                                                                                      | Description       | Brain control |                      | Dasatinib + brain |                      |
|-----|-----------------|-------------------------------------------------------------------------------------------------|-------------------|---------------|----------------------|-------------------|----------------------|
|     |                 |                                                                                                 |                   | Area          | Mass deviation (ppm) | Area              | Mass deviation (ppm) |
| 1   | 261.1457        | C <sub>12</sub> H <sub>17</sub> N <sub>6</sub> O <sup>-</sup>                                   | Fragment          | 0             | -4.8                 | 7466588           | 0.6                  |
| 2   | 231.1375        | C <sub>11</sub> H <sub>15</sub> N <sub>6</sub> <sup>-</sup>                                     | Fragment          | 396           | 7.1                  | 690695            | 1.8                  |
| 3   | 217.1194        | C <sub>10</sub> H <sub>13</sub> N <sub>6</sub> <sup>-</sup>                                     | Fragment          | 0             | -6.0                 | 938722            | -0.8                 |
| 4   | 174.0786        | C <sub>8</sub> H <sub>8</sub> N <sub>5</sub> <sup>-</sup>                                       | Fragment          | 1151          | 3.6                  | 1676612           | 1.0                  |
| 5   | 172.0628        | C <sub>8</sub> H <sub>6</sub> N <sub>5</sub> <sup>-</sup>                                       | Fragment          | 3692          | 2.9                  | 1131926           | -0.6                 |
| 6   | 160.0627        | C <sub>7</sub> H <sub>6</sub> N <sub>5</sub> <sup>-</sup>                                       | Fragment          | 17561         | 2.7                  | 7009838           | -0.5                 |
| 7   | 319.1326        | C <sub>14</sub> H <sub>19</sub> N <sub>6</sub> OS <sup>-</sup>                                  | Fragment          | 0             | -4.6                 | 4466339           | 1.1                  |
| 8   | 486.1449        | C <sub>22</sub> H <sub>25</sub><br>C <sub>12</sub> N <sub>7</sub> O <sub>2</sub> S <sup>-</sup> | M-H               | 0             | -6.2                 | 4444771           | 1.0                  |
| 9   | 255.2339        | C <sub>16</sub> H <sub>31</sub> O <sub>2</sub> <sup>-</sup>                                     | Brain lipid       | 24792697      | 1.2                  | 4787061           | 0.5                  |
| 10  | 281.2486        | C <sub>18</sub> H <sub>33</sub> O <sub>2</sub> <sup>-</sup>                                     | Brain lipid       | 42916135      | 0.9                  | 7523922           | 0.3                  |
| 11  | 385.3473        | C <sub>27</sub> H <sub>45</sub> O <sup>-</sup>                                                  | Brain cholesterol | 3582325       | -0.3                 | 2268736           | -0.8                 |
